# Supplementary material for: Facile Synthesis of Mesoporous Graphene Materials from Potassium Humate for Supercapacitor Electrodes
Source: Hindawi journal article supplement (doi:10.1155/2018/5818169), 2018-07-24
Supplement: f1 [file 5818169.f1.zip]

Archive with 3 entries (3 files):
- 5818169.f1/Figure S1.docx
- 5818169.f1/Figure S2.docx
- 5818169.f1/Table. S1.docx
