# Supplementary material for: Facile Synthesis of Mesoporous Graphene Materials from Potassium Humate for Supercapacitor Electrodes
Source: Hindawi journal article supplement (doi:10.1155/2018/5818169), 2018-07-24
Supplement: f1 [file 5818169.f1.zip › 5818169.f1/Figure S1.docx]

Figure: S1a S1b
