# Supplementary material for: Facile Synthesis of Mesoporous Graphene Materials from Potassium Humate for Supercapacitor Electrodes
Source: Hindawi journal article supplement (doi:10.1155/2018/5818169), 2018-07-24
Supplement: f1 [file 5818169.f1.zip › 5818169.f1/Table. S1.docx]

Table S1: Pore structure parameters of MC-X.

| Samples | SBET  (m2 g-1) | Vt  (cm3 g-1) | Vmic  (cm3 g-1) | Vmes  (cm3 g-1) | Vmes/Vt  (%) | Vmes/Vmic |
| --- | --- | --- | --- | --- | --- | --- |
| MC-1  MC-3 | 771  879 | 1.00  1.59 | 0.23  0.11 | 0.78  1.48 | 77.5  93.0 | 3.4  13.2 |
| MC-5 | 1020 | 2.09 | 0.10 | 1.99 | 95.2 | 19.7 |
